# Supplementary material for: Interfering with stem cell-specific gatekeeper functions controls tumour initiation and malignant progression of skin tumours
Source: Nat Commun. 2015 Jan 22;6:5874. doi: 10.1038/ncomms6874 (PMC4354047; doi:10.1038/ncomms6874)
Supplement: Supplementary Information — Supplementary Figures 1-7 [file ncomms6874-s1.pdf]

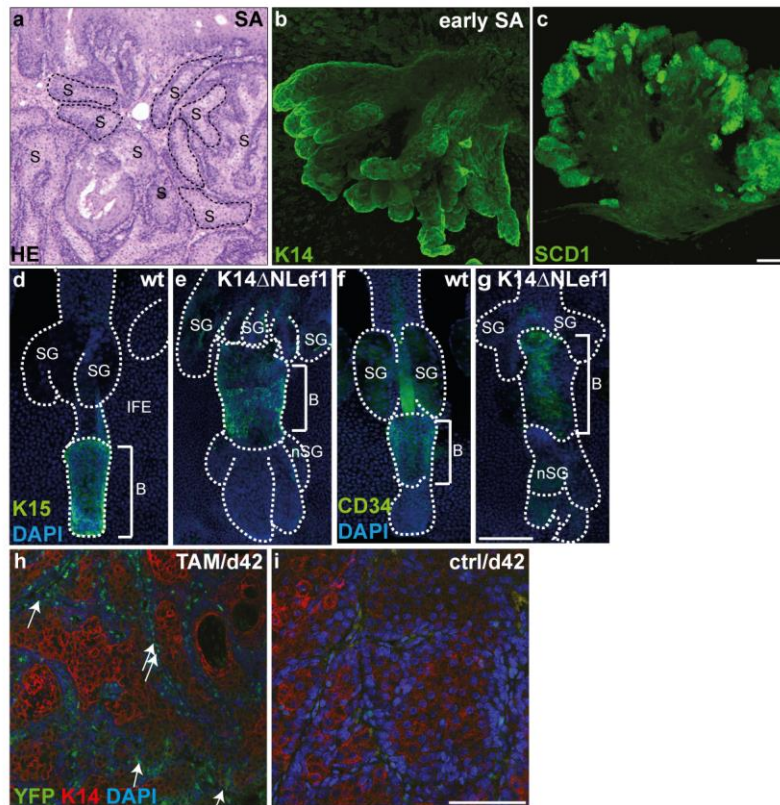

**Supplementary Figure 1. Sebaceous tumour phenotypes developing in K14 $\Delta$ NLef1 mice.**

**(a)** H&E stain of tumour sections from early sebaceous lesion.

**(b,c)** Immunofluorescent stainings of K14 (green) **(b)** and SCD1 (green) **(c)** in whole mounts of sebaceous tumours. **(d-g)** Detection of bulge stem cell marker K15 (green) **(d,e)** and CD34 (green) **(f,g)** in aged control (wt) and K14 $\Delta$ NLef1 mice. Counterstain with DAPI (blue) (n=3). Scale bar 200  $\mu$ m. SA, sebaceous adenoma; B, bulge; IFE, interfollicular epidermis; nSG, *de novo* sebaceous gland, SG, sebaceous gland. **(h,i)** Detection of EYFP (green), K14 (red) and nuclei (blue) in tumours of K14CreER(G)<sub>T2</sub>/K14 $\Delta$ NLef1/R26YFP mice 42 days following application of TAM **(h)** or oil **(i)**. Scale bar 50 $\mu$ m.

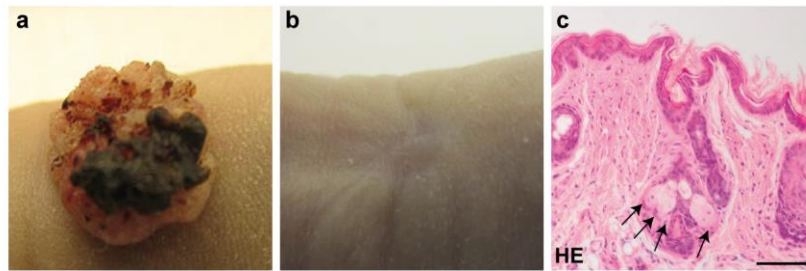

**Supplementary Figure 2. Transplantation of sebaceous tumour cells and mutant Lef1 keratinocytes.**

**(a)** Tumour derived from transplanted sebaceous tumour cells ( $1 \times 10^6$ ). **(c,b)** Skin of nude mice transplanted with sorted  $Itga6^{\text{high}}/CD34^{+ve}$  isolated from aged  $K14\Delta N\text{Lef1}$  mice. Note, no tumours develop following transplantation, but deformed hair follicle and multiple sebaceous glands are generated reflecting the phenotype of  $K14\Delta N\text{Lef1}$  mice (arrows in c). Scale bar  $200\mu\text{m}$ .

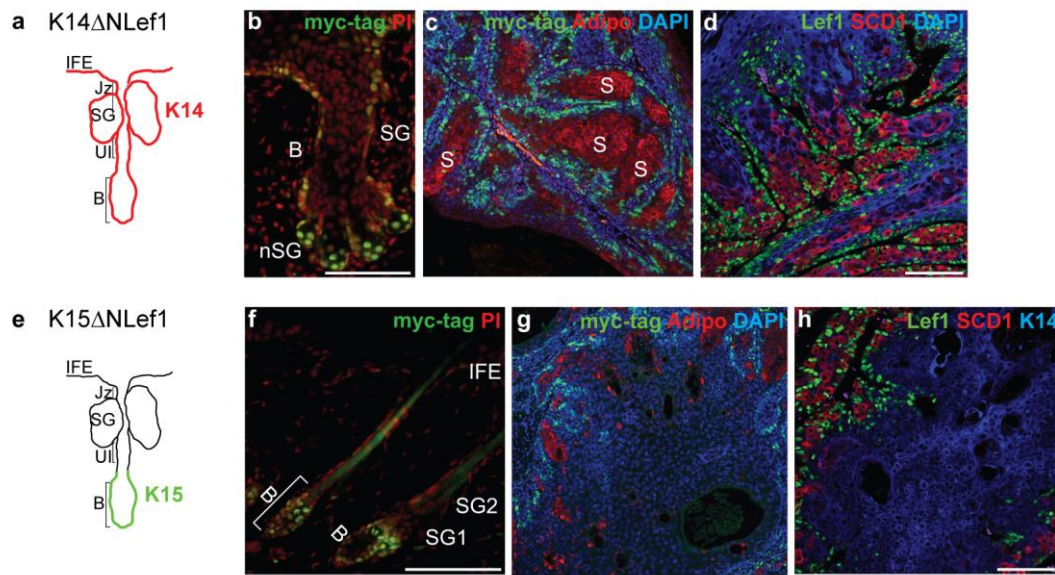

### Supplementary Figure 3. Characterisation of skin phenotype of K14 $\Delta$ NLeF1 and K15 $\Delta$ NLeF1 transgenic mice.

**(a-d)** Generation of K14 $\Delta$ NLeF1 mice and analysis of transgene expression in skin (n=5 mice) (myc-tag, green) **(b)** and in sebaceous adenomas (myc-tag, green) **(c)** (Lef1, green) **(d)**. Immunofluorescent staining for sebocyte marker adipophilin and SCD1 (both in red) demonstrate sebocyte differentiation of tumours (n=3). B, bulge; IFE, interfollicular epidermis; Jz, junctional zone; nSG, new additional sebaceous gland; S, sebaceous tumour lobules; SG, sebaceous gland; UI, upper isthmus. **(e-h)** Generation of K15 $\Delta$ NLeF1 mice and analysis of transgene expression in skin (n=5 mice) (myc-tag, green) **(f)** and in sebaceous tumours (myc-tag, green) **(g)** (Lef1, green) **(h)**. Immunofluorescent staining for sebocyte marker Adipophilin and SCD1 (both in red) demonstrates reduced sebocyte differentiation of tumours (n=4 mice, 12 tumours). Scale bars 50 $\mu$ m.

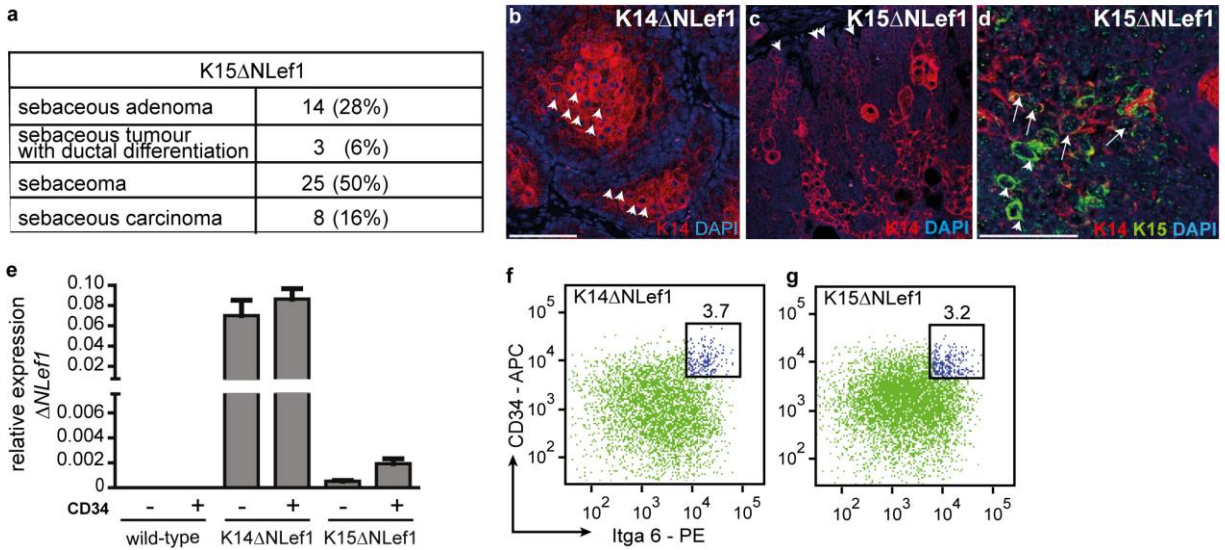

**Supplementary Figure 4. Tumour classification and transgene expression in K14 $\Delta$ NLef1 and K15 $\Delta$ NLef1 transgenic mice.**

**(a)** Classification of DMBA-induced skin tumours from K15 $\Delta$ NLef1 (n=9 mice, 31 tumours). **(b-d)** Immunofluorescent staining for K14 (red) **(b-d)** and K15 (red) **(d)** in tumours from K14 $\Delta$ NLef1 **(b)** and K15 $\Delta$ NLef1 mice **(c,d)**. Note low K14 protein in basal K15 $\Delta$ NLef1 tumour cells (arrow head in **c**) compared to K14 $\Delta$ NLef1 (arrow head in **b**) and detection of K15-positive (arrow heads) and K14/K15-double positive cells in sebaceous tumours (arrows in **d**). **(e)** Analysis of transgene expression by qRT-PCR in Itga6<sup>high</sup>/CD34<sup>-ve</sup> and Itga6<sup>high</sup>/CD34<sup>+ve</sup> FAC-sorted cells isolated from wild-type, K14 $\Delta$ NLef1 and K15 $\Delta$ NLef1 mice. Samples were normalized to 18S and SD was calculated (n=3). **(f,g)** FACS analysis of the CD34<sup>+ve</sup> bulge stem cell compartment in K14 $\Delta$ NLef1 **(f)** and K15 $\Delta$ NLef1 **(g)** mice (n=3). Scale bars 50 $\mu$ m.

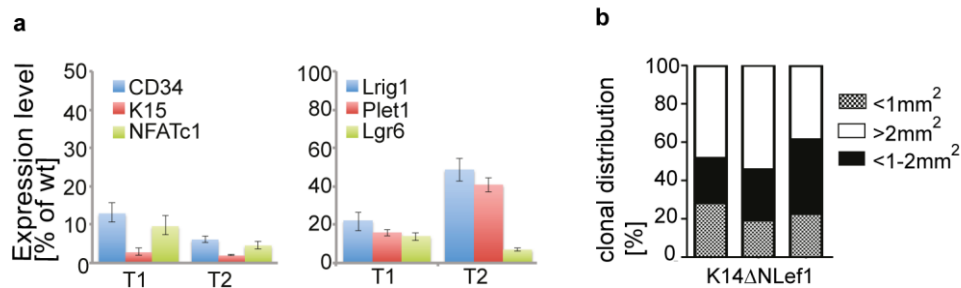

### Supplementary Figure 5. Analysis of bulge stem cell marker and colony forming assay

(a) Expression of bulge stem cell marker CD34, K15 and NFATc1 (left) and JZ/I-marker Plet1, Lrig1 and Lgr6 (right) in tumours isolated from K14ΔNLef1 mice analysed by qRT-PCR. Samples were normalized to 18S and wild-type (wt) controls and SD was calculated (n=6 tumours, n=3 mice). I, isthmus; JZ, junctional zone. (b) Colony forming assay with primary tumour cells isolated from K14ΔNLef1 mice (n=3).

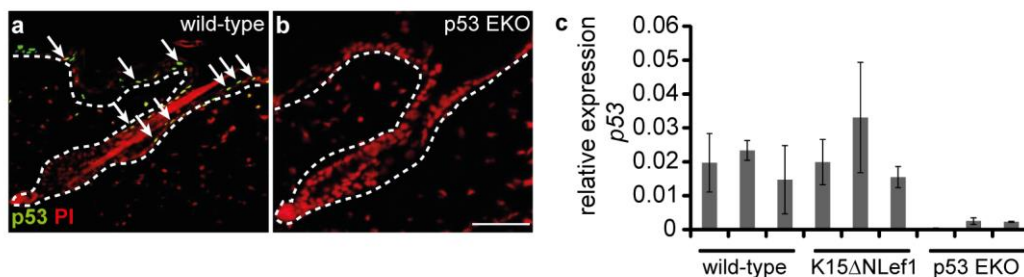

### Supplementary Figure 6. Characterisation of epidermal p53 knockout mice (p53<sup>EKO</sup>).

(a,b) Immunofluorescence staining for p53 (green, arrows) and PI (red) after UV-B irradiation in skin of wild-type (a) and p53<sup>EKO</sup> (b) mice (n=3). Scale bar 50μm. (c) qRT-PCR for p53 expression in epidermis from wild-type, K15ΔNLef1 and p53<sup>EKO</sup> mice. Samples were normalized to 18S and SD was calculated (n=3).

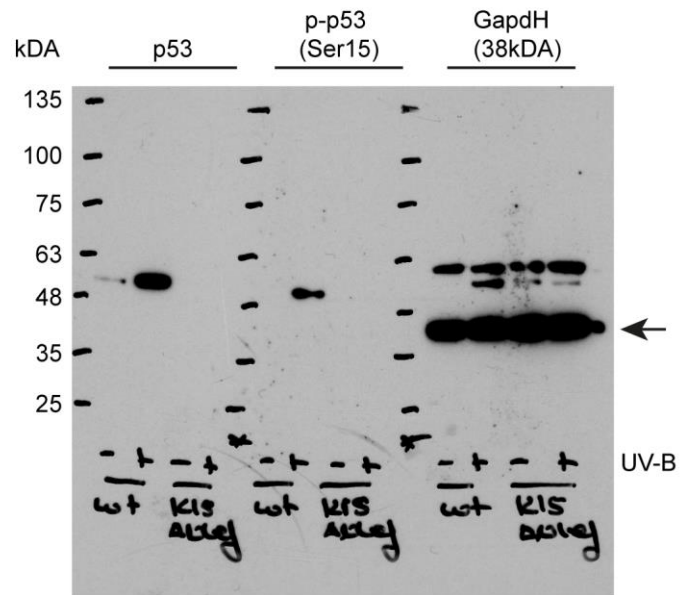

**Supplementary Figure 7. p53 protein response in K15 $\Delta$ NLeF1 mutant mice.**

Uncropped western blot for p53, p-p53 and GapDH (loading control) in epidermal lysates from wild-type and K15 $\Delta$ NLeF1 epidermis without (-) and 24h following UV treatment (+) (n=3).
